# Supplementary material for: New Facility for Membrane Fouling Investigations under Customizable Hydrodynamics: Validation and Preliminary Experiments with Pulsating Cross-Flow
Source: MDPI journal article supplement (doi:10.3390/membranes12030334), 2022-03-17
Supplement: s1 [file s1]

---

# New facility for membrane fouling investigations under customisable hydrodynamics: validation and preliminary experiments with pulsating cross-flow

---

Roberto Bert <sup>1,2</sup>, Costantino Manes <sup>1,2</sup> and Alberto Tiraferri <sup>1,2</sup>

<sup>1</sup> Department of Environmental Land and Infrastructure Engineering (DIATI), Politecnico di Torino, Corso Duca degli Abruzzi, 24 - 10129 Torino, Italy

<sup>2</sup> CleanWaterCenter@PoliTo, Politecnico di Torino, Corso Duca degli Abruzzi, 24 - 10129 Torino, Italy

## Supporting Information

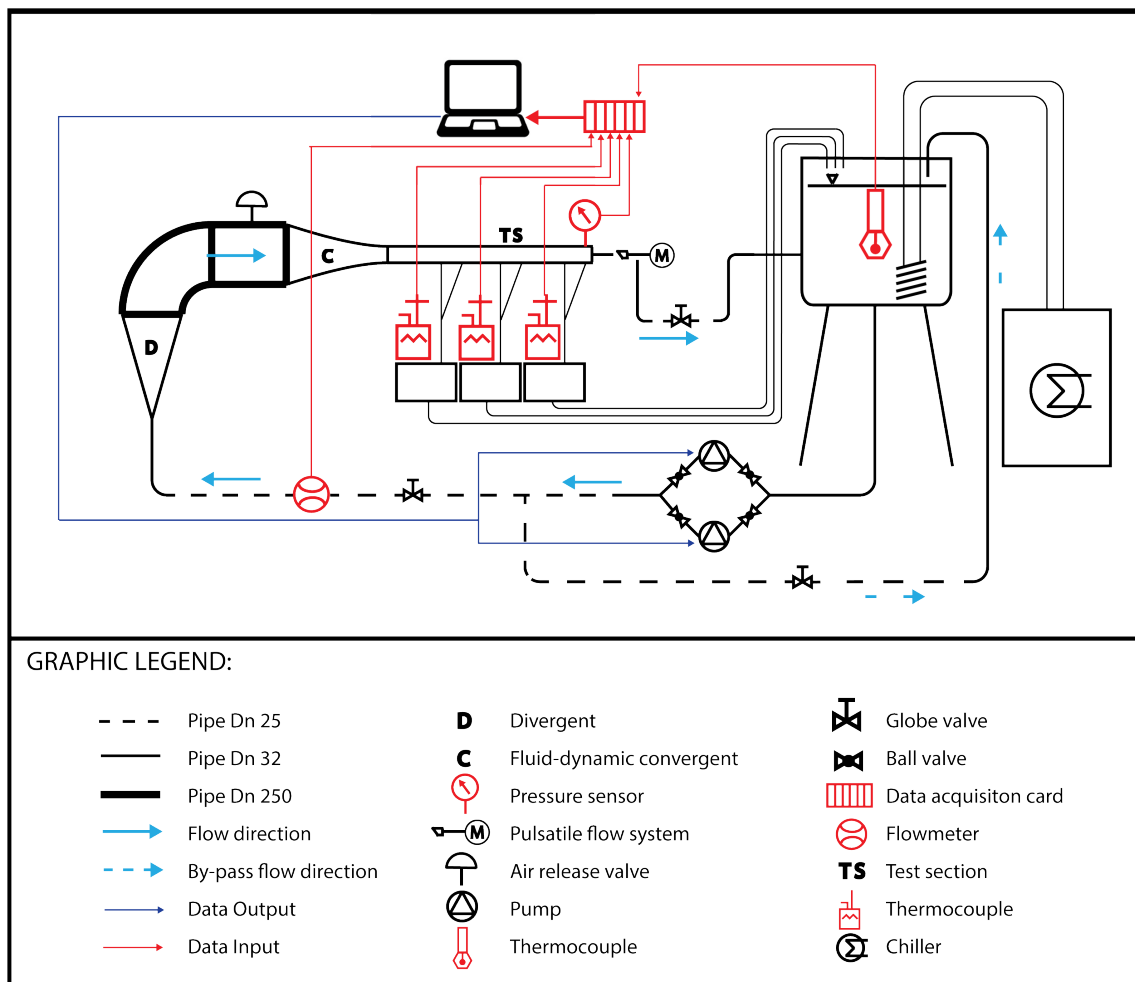

Figure S1: Pipes and instrumentation diagram (i.e. *P&ID* Diagram) of the overall facility.

Table S1: Geometries and properties of the main hydraulic components.

| Pipes            |            |                 |               |                   |                    |                   |               |
|------------------|------------|-----------------|---------------|-------------------|--------------------|-------------------|---------------|
| DN               |            | PN              |               | $\phi_{est}$ [mm] |                    | $\phi_{int}$ [mm] |               |
| 25               |            | 16              |               | 26.9              |                    | 22.9              |               |
| 32               |            | 16              |               | 42.4              |                    | 38.4              |               |
| 250              |            | 16              |               | 273               |                    | 267               |               |
| Pumps            |            |                 |               |                   |                    |                   |               |
| Type             | Power [kW] | $Q_{min}$ [l/s] | $H_{max}$ [m] | $Q_{70\%}$ [l/s]  | $H_{Q_{70\%}}$ [m] | $Q_{max}$ [l/s]   | $H_{min}$ [m] |
| Lowara - 5SV05   | 0.75       | 0.67            | 36.4          | 1.67              | 28.2               | 2.35              | 17.1          |
| Lowara - 5SV23   | 4          | 0.67            | 168.9         | 1.67              | 129.6              | 2.35              | 78.2          |
| Tanks            |            |                 |               |                   |                    |                   |               |
| Type             |            |                 |               |                   | Capacity [l]       |                   |               |
| Main tank        |            |                 |               |                   | 1000               |                   |               |
| Collecting tanks |            |                 |               |                   | 15                 |                   |               |
| Test section     |            |                 |               |                   |                    |                   |               |
| Length L [mm]    |            | Height H [mm]   |               | Width B [mm]      |                    | Thickness [mm]    |               |
| 1450             |            | 10              |               | 200               |                    | 25                |               |

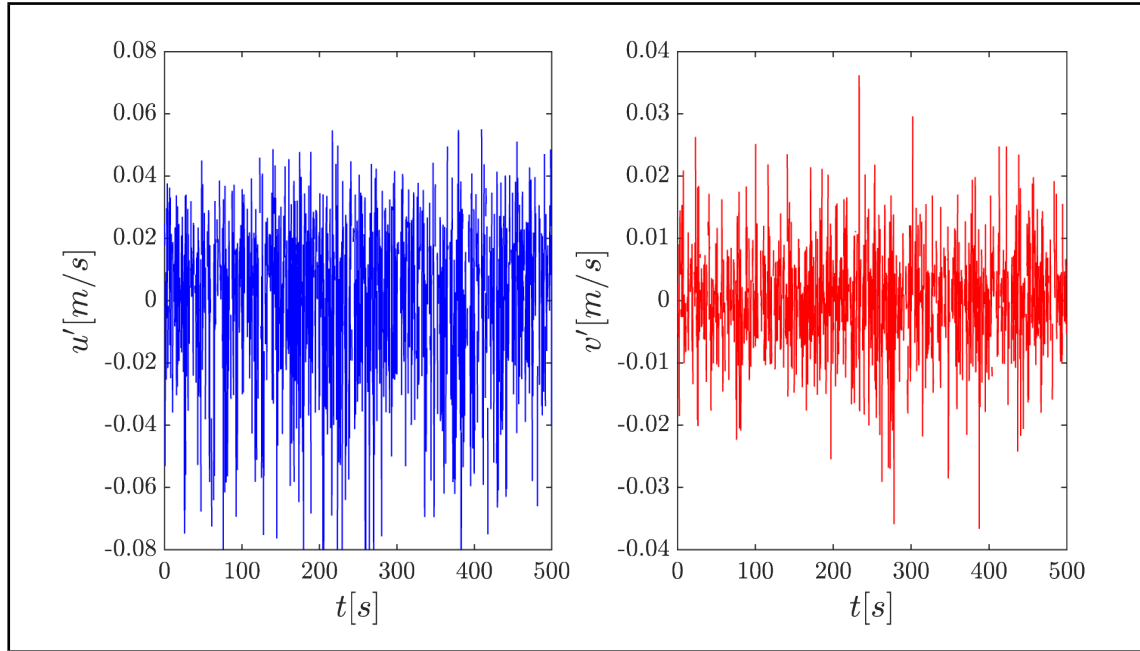

Figure S2: Time series of the longitudinal  $u'$  and wall-normal  $v'$  velocity fluctuations deduced by PIV measurement at the position F-2 and coordinates  $x = 17$  mm and  $y = 2.5$ .

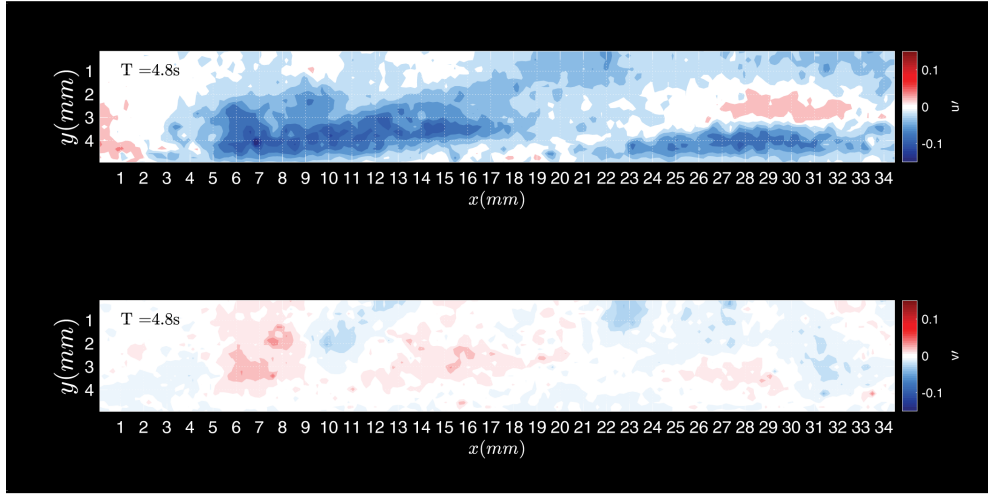

Figure S3: Contour plot of the longitudinal  $u'$  and wall-normal  $v'$  velocity fluctuations deduced by PIV measurement at the position F-2 at fixed time  $T = 4.8$  s.

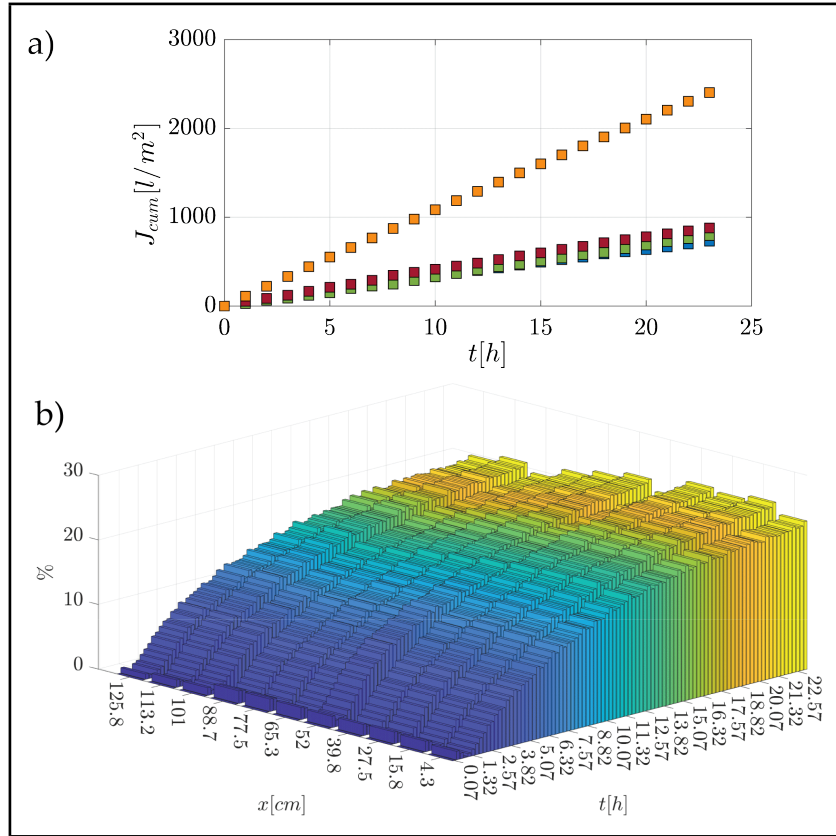

Figure S4: Results of filtration test S - 4.1: (a) Total water flux measured from the individual portions (Where blue, green and red symbols refer to up, mid and down collection tanks respectively and orange squares refer to the cumulative flux) and (b) percentage variation of the membrane colour (yellow band) measured at different longitudinal positions along the membrane surface.
